# Supplementary material
Source: MDPI journal article supplement (https://www.mdpi.com/2673-4087/3/2/23)
Supplement: s1 [file s1]

## Supplementary Matherial

**Table S1.** Demographic and clinical properties of patients with bilateral facial palsy/diplegia in complete Heerfordt's syndrome.

| No | Age  | Gender | Heerfordt's syndrome manifestations/H.B. Scale                                | Other Systemic Manifestation                 | Diagnostic finding                                                        | Treatment                                | Prognosis | References                          |
|----|------|--------|-------------------------------------------------------------------------------|----------------------------------------------|---------------------------------------------------------------------------|------------------------------------------|-----------|-------------------------------------|
| 1  | 32 Y | Male   | SBFP<br>Fever<br>Bilateral parotid swelling<br>Bilateral anterior uveitis     | Lung<br>LNP+<br>(mediastinal,hilar)          | -Serum ACE test ↑<br>-Parotid gland biopsy +                              | First-line therapy                       | CR        | Srirangaramasamy et al. - 2016 [28] |
| 2  | 42Y  | Female | SBFD/-/<br>Fever<br>Bilateral parotid swelling<br>Unilateral anterior uveitis | Lung/Eye/Skin<br>LNP+<br>(mediastinal,hilar) | - Skin biopsy +                                                           | First-line therapy                       | PR        | King et al - 2007 [29]              |
| 3  | 26Y  | Male   | SBFD/-/<br>Fever<br>Bilateral parotid swelling<br>Unilateral anterior uveitis | EMG: proximal demyelination facial nerves.   | -                                                                         | Fist-line therapy<br>Second-line therapy | CR        | Glocker et al. - 1999 [30]          |
| 4  | 52Y  | Female | SBFD/IV-IV/<br>Bilateral parotid swelling<br>Unilateral anterior uveitis      | Lung<br>LNP+<br>(mediastinal,hilar)          | -Serum ACE test ↑<br>- Parotid gland biopsy+                              | Fist-line therapy                        | PR (II-I) | Chappity et al - 2015 [8]           |
| 5  | NA   | NA     | SBFD/-/<br>Fever<br>Bilateral parotid swelling<br>Anterior uveitis            | -                                            | Parotid gland FNA cytology+                                               | -                                        | -         | Chappity et al - 2015 [8]           |
| 6  | NA   | NA     | SBFD/-/<br>Fever<br>Bilateral parotid swelling<br>Anterior uveitis            | -                                            | Parotid gland FNA cytology+                                               | -                                        | -         |                                     |
| 7  | NA   | NA     | SBFD/-/<br>Fever<br>Bilateral parotid swelling<br>Anterior uveitis            | -                                            | Parotid gland FNA cytology+<br>-Bilateral Gasser's ganglia MRI impairment | -                                        | -         |                                     |
| 8  | NA   | NA     | SBFD/-/<br>Bilateral parotid swelling<br>Anterior uveitis                     | -                                            | Parotid gland FNA cytology+                                               | -                                        | -         |                                     |

CR: complete recovery; +/-: unknown; HB Scale: House Brackmann Scale; FNA: fine-needle aspiration LNP+: lymphadenopathy; PPR: partial recovery; S: skin; SBFD: simultaneous bilateral facial diplegia; SBFP/RBFP: simultaneous/recurrent bilateral facial palsy
